# Supplementary material for: Distressed (Type D) personality is predicted by avoidance: evidence from a computer-based avatar task
Source: PeerJ. 2022 Oct 27;10:e14302. doi: 10.7717/peerj.14302 (PMC9618263; doi:10.7717/peerj.14302)
Supplement: Supplemental Information 1 [file peerj-10-14302-s001.xlsx]

## Sheet: grouped Type D
age	gender	years of ed	NA	SI	TYPE D	avatar score	Type D group
20	Female	13	9	0	0	5	low both
18	Female	12	0	1	0	6	low both
19	Female	13	5	2	10	15	low both
22	Female	14	4	3	12	18	low both
19	Female	14	9	3	27	8	low both
18	Female	14	2	4	8	8	low both
18	Female	12	5	4	20	13	low both
20	Female	14	7	4	28	13	low both
18	Female	12	0	5	0	22	low both
18	Female	13	6	5	30	15	low both
18	Female	12	8	6	48	14	low both
19	Female	14	1	7	7	14	low both
21	Female	15	7	7	49	16	low both
18	Female	12	2	8	16	16	low both
18	Female	12	3	8	24	18	low both
18	Female	12	3	8	24	19	low both
18	Female	12	3	8	24	18	low both
18	Female	12	7	8	56	23	low both
21	Female	14	7	8	56	14	low both
18	Female	12	1	9	9	16	low both
21	Female	15	4	9	36	7	low both
18	Male	12	8	2	16	14	low both
18	Male	12.5	5	4	20	8	low both
18	Male	12	6	4	24	16	low both
20	Male	14	7	4	28	10	low both
19	Male	14	6	5	30	21	low both
18	Male	12	2	6	12	10	low both
18	Male	12	6	6	36	20	low both
18	Male	12	6	6	36	11	low both
18	Male	12	3	7	21	8	low both
19	Male	12	1	8	8	20	low both
18	Male	12	8	8	64	11	low both
19	Male	12	1	9	9	16	low both
18	Male	12	7	9	63	16	low both
18	Male	12	9	9	81	15	low both
18	Female	12	1	1	1	9	Low both
18	Female	12	2	2	4	12	Low both
18	Female	12	5	2	10	11	Low both
20	Female	13.5	7	2	14	6	Low both
18	Female	12	3	4	12	9	Low both
18	Female	12	3	4	12	22	Low both
18	Female	12	0	5	0	17	Low both
19	Female	14	7	5	35	8	Low both
18	Female	12	9	5	45	17	Low both
18	Female	12	1	6	6	21	Low both
19	Female	13	3	6	18	16	Low both
18	Female	13	8	6	48	12	Low both
19	Female	12	8	6	48	13	Low both
19	Female	14	2	7	14	24	Low both
19	Female	14	6	7	42	16	Low both
18	Female	12	7	7	49	17	Low both
18	Female	12	9	7	63	14	Low both
18	Female	12	2	8	16	14	Low both
19	Female	14	4	8	32	14	Low both
18	Female	12	5	8	40	16	Low both
18	Female	12	7	8	56	28	Low both
18	Female	12	7	8	56	17	Low both
22	Female	14	2	9	18	29	Low both
21	Female	15	4	9	36	15	Low both
18	Female	12	6	9	54	24	Low both
18	Female	13	7	9	63	18	Low both
18	Female	12	9	9	81	12	Low both
19	Male	12	0	3	0	14	Low both
19	Male	12.5	9	3	27	13	Low both
19	Male	13	2	4	8	12	Low both
47	Male	14	6	4	24	10	Low both
18	Male	13	1	5	5	22	Low both
19	Male	12	6	5	30	17	Low both
21	Male	15	4	6	24	17	Low both
18	Male	13	7	6	42	11	Low both
18	Male	12	7	7	49	14	Low both
20	Male	14	8	7	56	16	Low both
19	Male	14	8	7	56	7	Low both
19	Male	12	3	8	24	20	Low both
18	Male	12	6	8	48	19	Low both
20	Male	14	0	9	0	14	Low both
21	Male	12	2	9	18	12	Low both
56	Male	18	4	9	36	17	Low both
18	Male	12	5	9	45	15	Low both
20	Male	15	8	9	72	14	Low both
19	Female	14	0	10	0	14	high SI
19	Female	14	7	11	77	14	high SI
18	Female	12	7	12	84	17	high SI
18	Female	13	8	12	96	18	high SI
18	Female	12	8	12	96	16	high SI
18	Female	12	9	12	108	18	high SI
18	Female	13	9	12	108	17	high SI
19	Female	12	8	13	104	21	high SI
18	Female	12	8	14	112	23	high SI
20	Female	14	9	14	126	17	high SI
18	Female	13	7	15	105	28	high SI
52	Female	15	7	15	105	23	high SI
20	Female	13	8	16	128	23	high SI
18	Female	12	3	17	51	23	high SI
19	Female	13	3	17	51	20	high SI
21	Female	15	8	20	160	28	high SI
18	Female	12	6	21	126	17	high SI
18	Male	12	0	10	0	24	high SI
18	Male	12	4	10	40	21	high SI
18	Male	12	6	10	60	18	high SI
18	Male	12	9	10	90	18	high SI
19	Male	12	2	11	22	16	high SI
18	Male	12	3	11	33	19	high SI
19	Male	12	2	12	24	20	high SI
18	Male	12	1	13	13	16	high SI
18	Male	12	6	13	78	16	high SI
18	Male	13	8	13	104	12	high SI
21	Male	15	6	15	90	16	high SI
21	Male	13	9	15	135	19	high SI
18	Male	12	9	15	135	26	high SI
23	Female	15	0	10	0	10	high SI
18	Female	12	4	10	40	18	high SI
23	Female	17	5	10	50	18	high SI
21	Female	14	9	10	90	16	high SI
21	Female	15	6	11	66	13	high SI
19	Female	14	6	11	66	16	high SI
21	Female	16	6	11	66	12	high SI
18	Female	13	7	11	77	24	high SI
18	Female	12	7	11	77	12	high SI
20	Female	14	7	11	77	19	high SI
18	Female	14	9	11	99	14	high SI
20	Female	13	9	11	99	21	high SI
19	Female	12	9	11	99	24	high SI
18	Female	12	7	12	84	22	high SI
21	Female	16	8	12	96	23	high SI
18	Female	12	8	13	104	20	high SI
19	Female	12	3	14	42	17	high SI
19	Female	13	6	14	84	20	high SI
19	Female	13	7	14	98	26	high SI
18	Female	12	8	14	112	22	high SI
18	Female	12	8	15	120	27	high SI
18	Female	13	6	16	96	23	high SI
21	Female	15	8	16	128	20	high SI
18	Female	13	9	18	162	13	high SI
18	Female	12	5	19	95	26	high SI
18	Female	12	8	19	152	28	high SI
19	Female	13	9	20	180	21	high SI
19	Female	13.5	8	22	176	27	high SI
19	Female	12	9	26	234	23	high SI
18	Male	12	4	10	40	23	high SI
22	Male	14	6	10	60	17	high SI
22	Male	16	8	10	80	20	high SI
20	Male	14	7	11	77	19	high SI
18	Male	13	9	11	99	18	high SI
20	Male	14	7	12	84	14	high SI
20	Male	13	4	13	52	9	high SI
24	Male	13	8	17	136	22	high SI
22	Male	13	2	23	46	21	high SI
20	Female	15	11	3	33	14	high NA
20	Female	14	11	4	44	15	high NA
20	Female	12	14	5	70	18	high NA
18	Female	12	16	6	96	13	high NA
18	Female	13	15	7	105	6	high NA
18	Female	12	12	8	96	15	high NA
18	Female	12	10	9	90	15	high NA
19	Male	14	11	6	66	12	high NA
19	Male	12	15	7	105	15	high NA
20	Male	12	15	7	105	19	high NA
19	Male	12	10	8	80	17	high NA
18	Male	12	10	9	90	19	high NA
18	Male	12	13	9	117	24	high NA
18	Female	12	12	0	0	10	high NA
23	Female	14	11	1	11	7	high NA
18	Female	12	10	4	40	13	high NA
20	Female	14	10	5	50	13	high NA
19	Female	14	11	6	66	17	high NA
18	Female	12	12	6	72	17	high NA
19	Female	14	12	6	72	22	high NA
19	Female	12.5	19	6	114	15	high NA
18	Female	12	12	7	84	12	high NA
40	Female	14	12	7	84	17	high NA
19	Female	12	12	8	96	22	high NA
18	Female	12	16	8	128	30	high NA
19	Female	14	19	8	152	14	high NA
19	Female	13.5	11	9	99	19	high NA
18	Female	12	12	9	108	20	high NA
19	Female	13	12	9	108	9	high NA
18	Female	12	19	9	171	26	high NA
19	Female	12	25	9	225	17	high NA
20	Male	15	12	6	72	14	high NA
18	Male	12	10	8	80	23	high NA
19	Male	13	11	8	88	19	high NA
26	Male	18	11	8	88	16	high NA
18	Male	12	10	9	90	18	high NA
18	Male	13	13	9	117	12	high NA
18	Female	12	10	10	100	13	Type D
19	Female	13	17	11	187	16	Type D
18	Female	12	16	12	192	21	Type D
18	Female	12	19	12	228	20	Type D
18	Female	12	13	13	169	15	Type D
18	Female	12	16	13	208	10	Type D
18	Female	12	19	13	247	15	Type D
18	Female	12	10	14	140	23	Type D
24	Female	14	12	14	168	19	Type D
18	Female	12	17	14	238	17	Type D
18	Female	13	11	15	165	19	Type D
18	Female	12.5	13	15	195	23	Type D
18	Female	13	14	15	210	16	Type D
18	Female	13	21	15	315	16	Type D
18	Female	12	11	16	176	17	Type D
18	Female	12	11	16	176	20	Type D
20	Female	12	10	17	170	15	Type D
19	Female	12	14	17	238	22	Type D
19	Female	12	17	17	289	20	Type D
21	Female	14	20	17	340	20	Type D
19	Female	13	16	18	288	29	Type D
18	Female	12	18	18	324	25	Type D
19	Female	14	19	18	342	16	Type D
18	Female	12	15	19	285	18	Type D
44	Female	16	11	20	220	20	Type D
19	Female	14	14	21	294	29	Type D
18	Female	12	15	21	315	26	Type D
20	Female	14	20	21	420	29	Type D
21	Female	12	12	23	276	32	Type D
18	Female	12	19	23	437	24	Type D
18	Male	12	11	10	110	22	Type D
18	Male	12	11	11	121	22	Type D
18	Male	12	13	11	143	17	Type D
20	Male	12	22	12	264	22	Type D
18	Male	13	12	13	156	19	Type D
18	Male	12	22	13	286	14	Type D
19	Male	12	10	14	140	24	Type D
18	Male	12	13	15	195	30	Type D
20	Male	12	11	16	176	25	Type D
22	Male	16	10	17	170	18	Type D
18	Male	13	23	18	414	21	Type D
18	Male	12	16	26	416	30	Type D
19	Female	14	10	10	100	15	type D
18	Female	12	11	10	110	21	type D
19	Female	14	11	10	110	26	type D
19	Female	12	13	10	130	22	type D
18	Female	12	13	10	130	16	type D
18	Female	14	14	10	140	18	type D
18	Female	12	10	11	110	25	type D
18	Female	12	10	11	110	26	type D
22	Female	15	11	11	121	21	type D
19	Female	13	17	11	187	14	type D
19	Female	13	10	12	120	26	type D
18	Female	12	11	12	132	24	type D
18	Female	12	12	12	144	23	type D
19	Female	12	12	12	144	25	type D
18	Female	12	13	12	156	23	type D
18	Female	12	16	12	192	15	type D
19	Female	12	17	12	204	23	type D
18	Female	12	18	12	216	20	type D
19	Female	12	19	12	228	14	type D
26	Female	15	20	12	240	28	type D
18	Female	12	10	13	130	14	type D
18	Female	12	11	13	143	24	type D
20	female	14	11	13	143	18	type D
18	Female	12	16	13	208	19	type D
20	Female	14	19	13	247	17	type D
18	Female	12	20	13	260	26	type D
18	Female	12	12	14	168	16	type D
21	Female	15	14	14	196	19	type D
18	Female	12	10	15	150	19	type D
19	Female	13	12	15	180	16	type D
20	Female	14	19	15	285	23	type D
19	Female	14	21	15	315	14	type D
18	Female	14	13	16	208	25	type D
18	Female	12	16	16	256	30	type D
21	Female	15	18	16	288	21	type D
18	Female	12	10	17	170	25	type D
18	Female	12	15	17	255	25	type D
19	Female	13	17	17	289	33	type D
18	Female	12	14	18	252	21	type D
19	Female	14	22	19	418	28	type D
18	Female	14	12	20	240	26	type D
19	Female	13	17	20	340	32	type D
22	Female	16	18	20	360	29	type D
20	Female	14	13	21	273	25	type D
21	Female	16	16	22	352	20	type D
18	Female	12	14	23	322	20	type D
19	Female	14	15	23	345	23	type D
18	Female	13	27	23	621	28	type D
19	Female	12	13	24	312	27	type D
20	Female	14	24	24	576	36	type D
20	Female	14	13	25	325	26	type D
22	Female	16	21	25	525	23	type D
18	Female	12	24	25	600	28	type D
19	Male	12	10	10	100	11	type D
22	Male	12	12	10	120	20	type D
19	Male	14	14	10	140	21	type D
18	Male	12	15	10	150	14	type D
20	Male	12	11	12	132	12	type D
19	Male	14	11	12	132	9	type D
22	Male	16	12	13	156	22	type D
18	Male	12	13	13	169	18	type D
18	Male	13	10	14	140	17	type D
19	Male	12	13	15	195	18	type D
19	Male	12	18	16	288	21	type D
18	Male	12	13	18	234	21	type D
19	Male	13	13	19	247	21	type D
19	Male	14	25	19	475	20	type D
18	Male	12.5	26	19	494	17	type D
20	Male	15	14	20	280	21	type D
20	Male	14	10	21	210	21	type D
18	Male	12	15	22	330	25	type D
19	Male	12	14	24	336	25	type D
19	Male	14	24	25	600	29	type D
22	Male	14	23	26	598	33	type D
21	Male	16	25	28	700	11	type D
